# Supplementary material for: Preparation and characterization of SiC@CNT coaxial nanocables using CNTs as a template
Source: Royal Society of Chemistry journal article supplement (doi:10.1039/c4ce00693c), 2014-01-01
Supplement: c4ce00693c1.pdf [file c4ce00693c1.pdf]

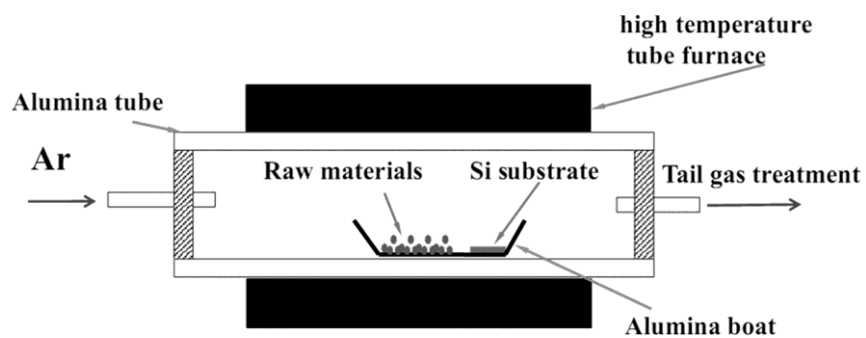

Fig. S1 The schematic diagram of the reactor system

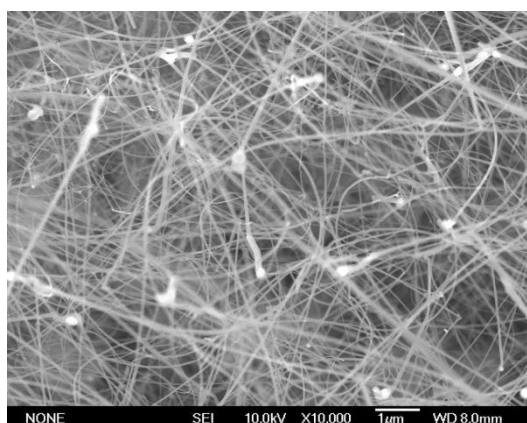

Fig. S2 The SEM image of SiC nanowires on Si substrate by using  $\text{Ni}(\text{NO}_3)_2$  (0.04M) as catalyst
